# Supplementary material for: Development of an Individualized Prediction Calculator for the Benefit of Postoperative Radiotherapy in Patients with Surgically Resected De Novo Stage IV Breast Cancer
Source: PubMed Central journal article supplement (PMC7464221; doi:10.3390/cancers12082103), 2020-07-29
Supplement: cancers-12-02103-s001.pdf [file cancers-12-02103-s001.pdf]

### Distribution of Propensity Scores

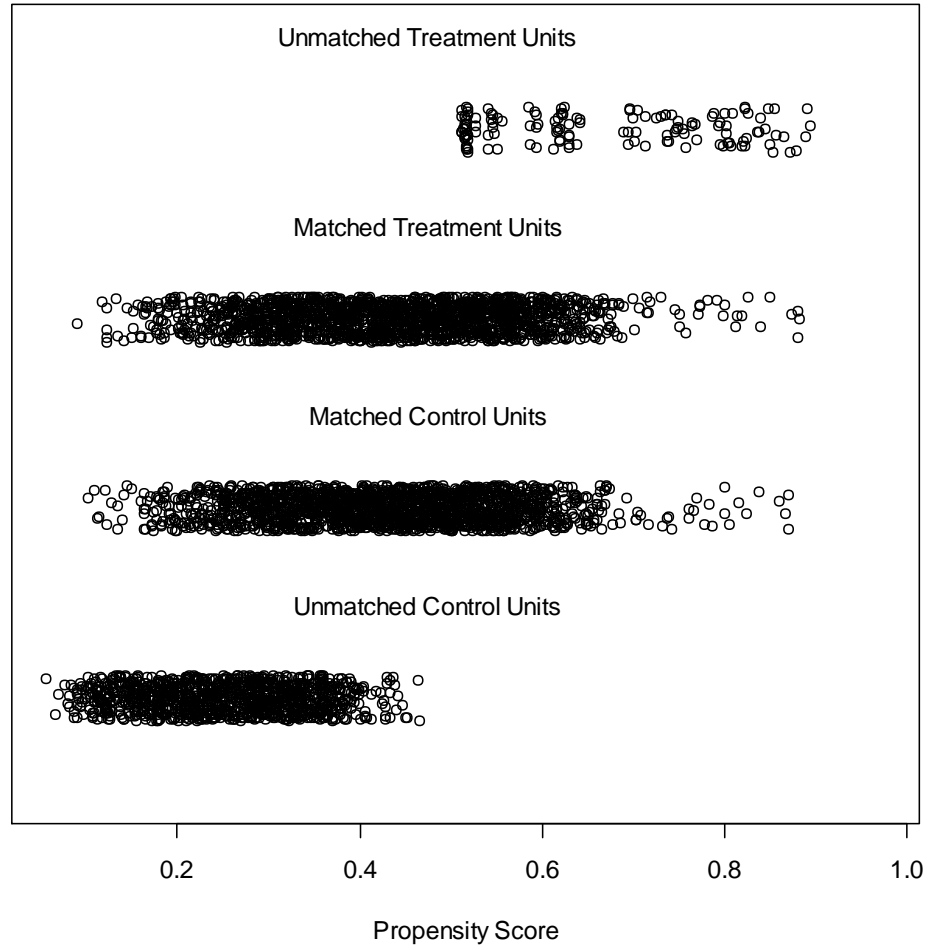

#### Raw Treated

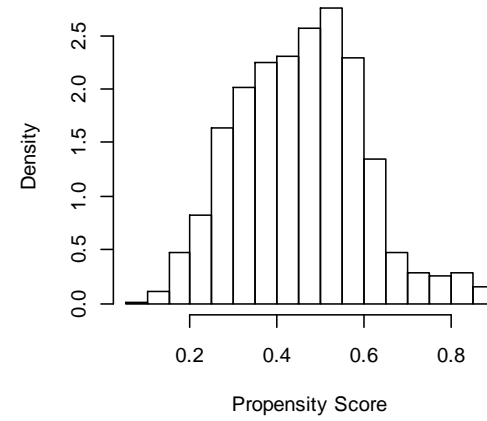

#### Matched Treated

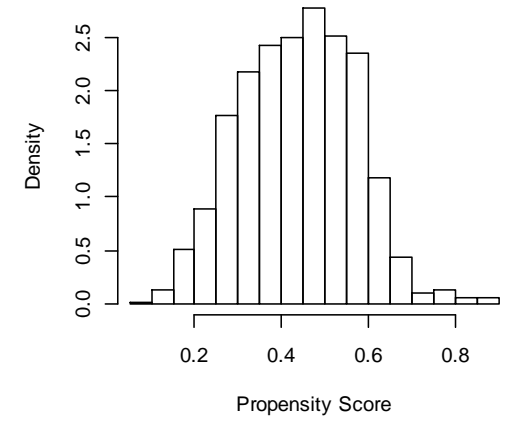

#### Raw Control

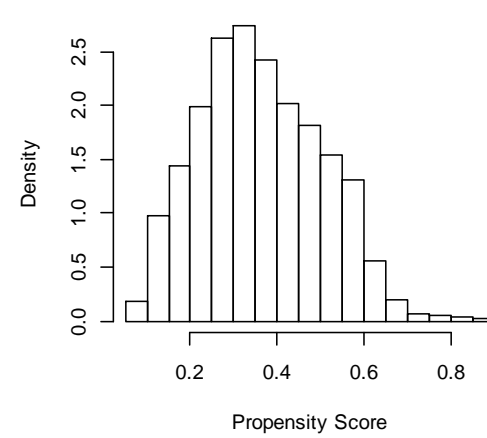

#### Matched Control

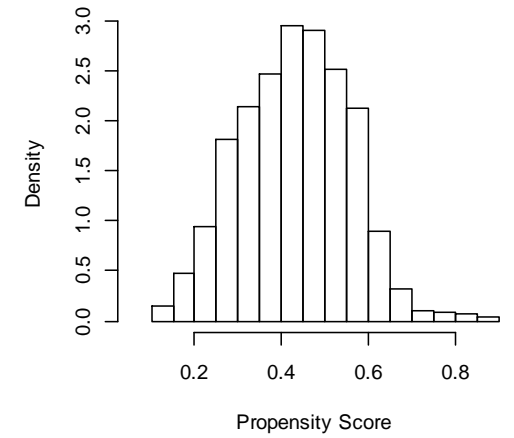

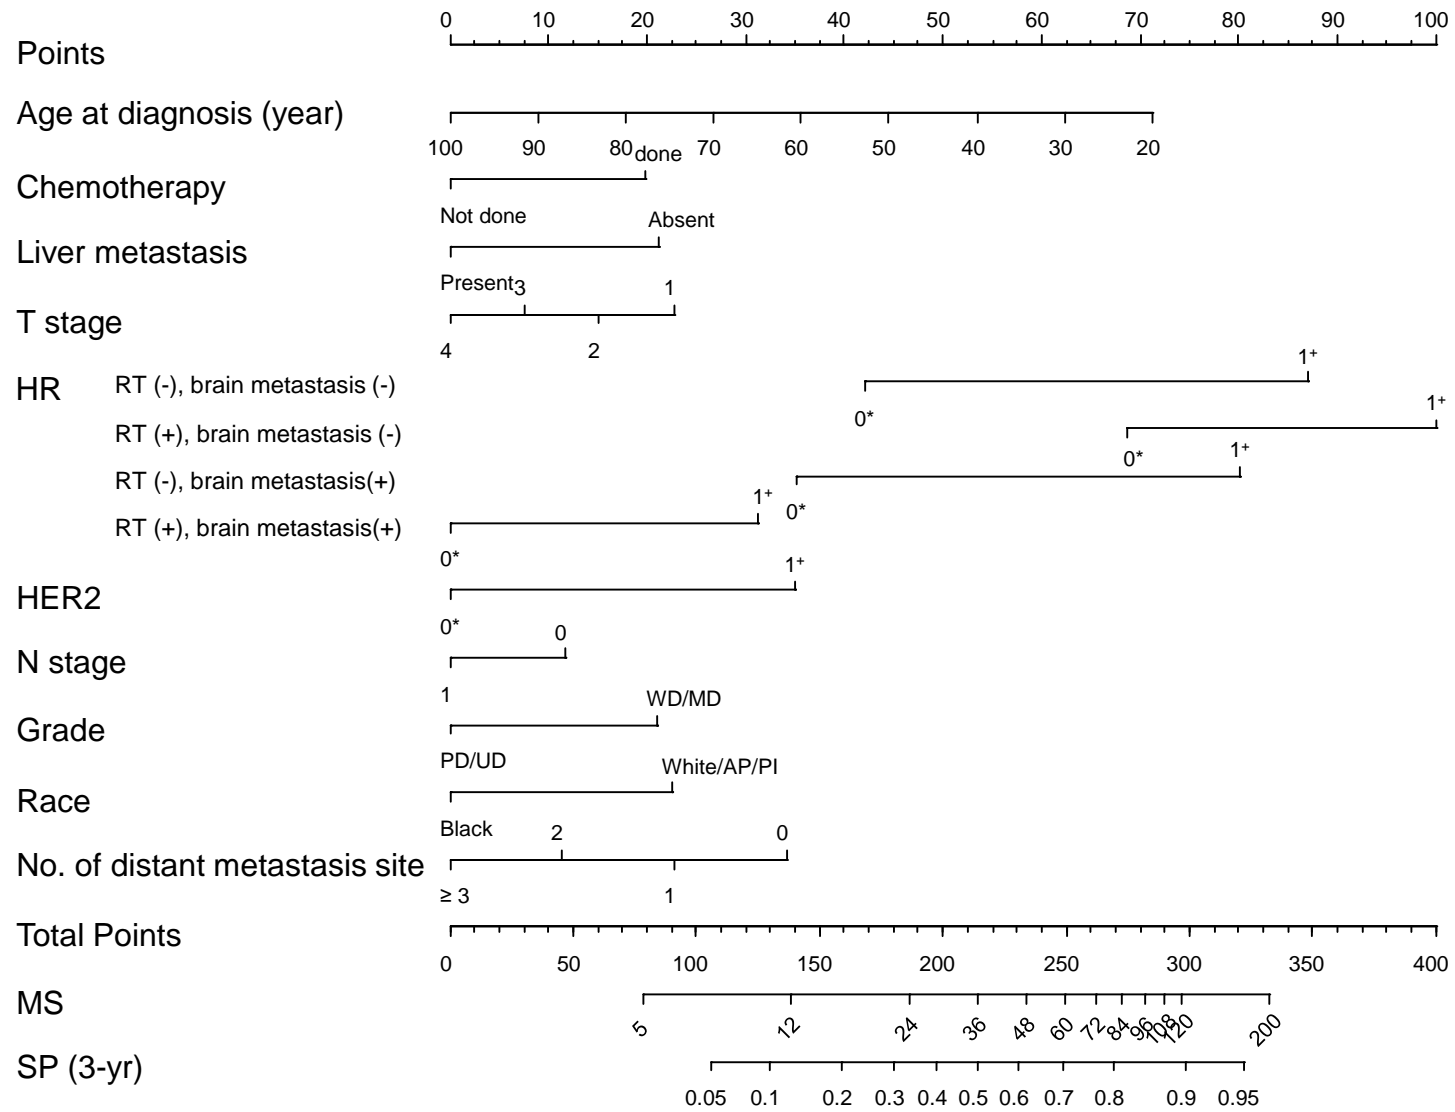

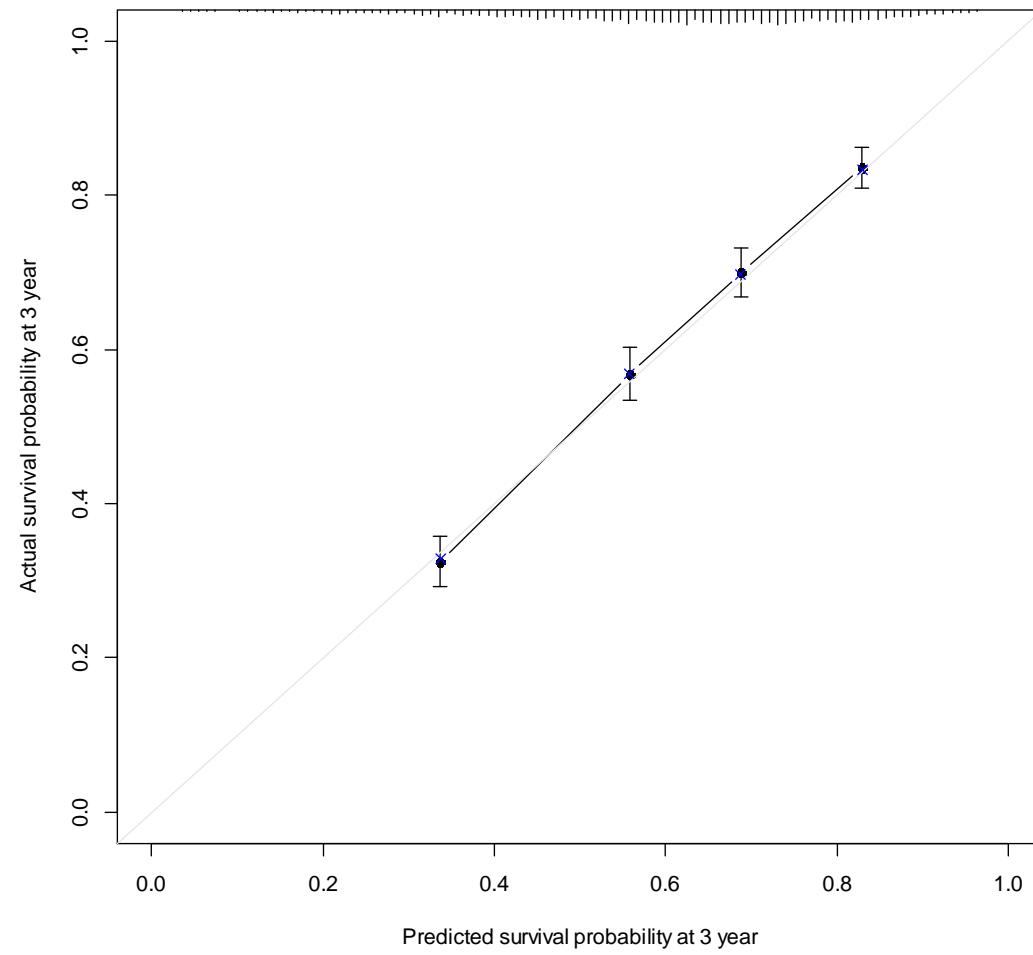

**Supplementary Table 1. Univariate and multivariate analyses for overall survival in the study population**

| Characteristics        |                  | 3-year OS (%) | Univariate analysis <sup>a</sup> | Multivariate analysis <sup>b</sup> | HR (95% CI)      |
|------------------------|------------------|---------------|----------------------------------|------------------------------------|------------------|
| Age at diagnosis       |                  |               | <0.001                           | <0.001                             | 1.02 (1.02-1.02) |
| Race                   | White/others     | 60.4          | <0.001                           | <0.001                             | 1                |
|                        | Black            | 45.1          |                                  |                                    | 1.35 (1.20-1.52) |
| T stage                | 1                | 66.9          | <0.001                           |                                    | 1                |
|                        | 2                | 61.6          |                                  | 0.008                              | 1.23 (1.06-1.43) |
|                        | 3                | 56.9          |                                  | <0.001                             | 1.38 (1.16-1.63) |
|                        | 4                | 14.7          |                                  | <0.001                             | 1.60 (1.36-1.87) |
| N stage                | 0-2              | 59.5          | <0.001                           | <0.001                             | 1                |
|                        | 3                | 54.4          |                                  |                                    | 1.29 (1.16-1.43) |
| Grade                  | 1-2              | 68.5          | <0.001                           | <0.001                             | 1                |
|                        | 3-4              | 49.8          |                                  |                                    | 1.46 (1.32-1.62) |
| Hormone receptor       | Negative         | 39.2          | <0.001                           | <0.001                             | 1                |
|                        | Positive         | 65.0          |                                  |                                    | 0.50 (0.45-0.56) |
| HER2 receptor          | Negative         | 54.8          | <0.001                           | <0.001                             | 1                |
|                        | Positive         | 68.5          |                                  |                                    | 0.48 (0.43-0.54) |
| Breast operation       | Mastectomy       | 58.3          | 0.861                            | -                                  |                  |
|                        | Lumpectomy       | 57.9          |                                  |                                    |                  |
| Chemotherapy           | Not done/unknown | 54.1          | <0.001                           | <0.001                             | 1                |
|                        | Done             | 59.7          |                                  |                                    | 0.81 (0.72-0.90) |
| Radiotherapy           | Not done/unknown | 54.1          | <0.001                           | <0.001                             | 1                |
|                        | Done             | 63.5          |                                  |                                    | 0.80 (0.73-0.88) |
| Bone metastasis        | Absent           | 56.3          | 0.984                            | -                                  |                  |
|                        | Present          | 59.6          |                                  |                                    |                  |
| Brain metastasis       | Absent           | 59.3          | <0.001                           | <0.001                             | 1                |
|                        | Present          | 30.2          |                                  |                                    | 1.98 (1.55-2.52) |
| Liver metastasis       | Absent           | 61.2          | <0.001                           | <0.001                             | 1                |
|                        | Present          | 46.0          |                                  |                                    | 1.49 (1.29-1.72) |
| Lung metastasis        | Absent           | 61.2          | <0.001                           | 0.577                              | 1                |
|                        | Present          | 48.0          |                                  |                                    | 1.03 (0.90-1.18) |
| No of metastatic site* | 0                | 64.3          | <0.001                           |                                    | 1                |
|                        | 1                | 60.4          |                                  | 0.012                              | 1.18 (1.04-1.35) |
|                        | 2                | 48.1          |                                  | <0.001                             | 1.49 (1.21-1.82) |
|                        | 3-4              | 29.0          |                                  | <0.001                             | 1.82 (1.30-2.54) |

OS, overall survival; HR, hazard ratio; CI, confidence interval;

\*No of metastatic site = bone metastasis + brain metastasis + liver metastasis + lung metastasis

<sup>a</sup>P-value by Log-rank test<sup>b</sup>P-value by Cox proportional hazard model
